# Supplementary material
Source: publisher figshare collection journal article supplement (https://acs.figshare.com/ndownloader/files/3613761)

## Supplementary Material

**Figure S1.** EPR spectra of ferric gsNOS and its complexes with NHA and its methylated analogues. Conditions: T = 10K; P = 2mW, Am = 10G

**Figure S2.** EPR spectra of cryoreduced gsNOS<sub>oxy</sub>-NMOA annealed under indicated conditions. Instrument conditions: T = 28K; modulation amplitude 10G; microwave power 10 mW, microwave frequency 9.364 GHz.

**Figure S3.** EPR spectra of cryoreduced gsNOS<sub>oxy</sub>-NMMA annealed under indicated conditions. Instrument conditions: T = 28K; modulation amplitude 10G; microwave power 10 mW, microwave frequency 9.364 GHz.

Figure S1.

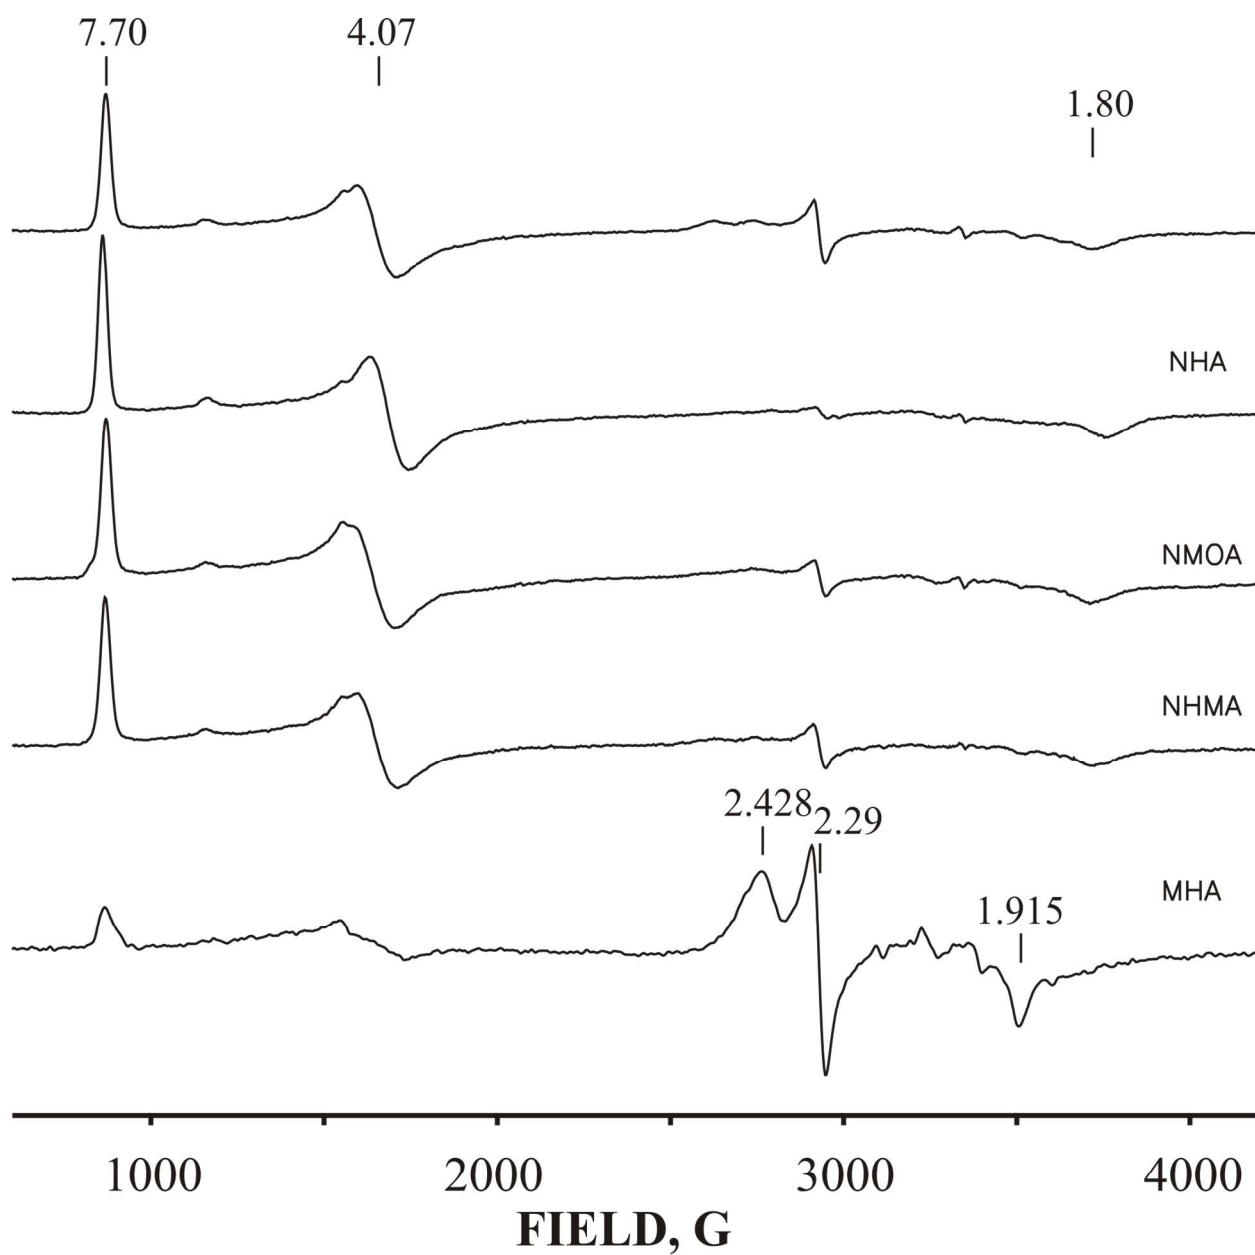

Figure S2.

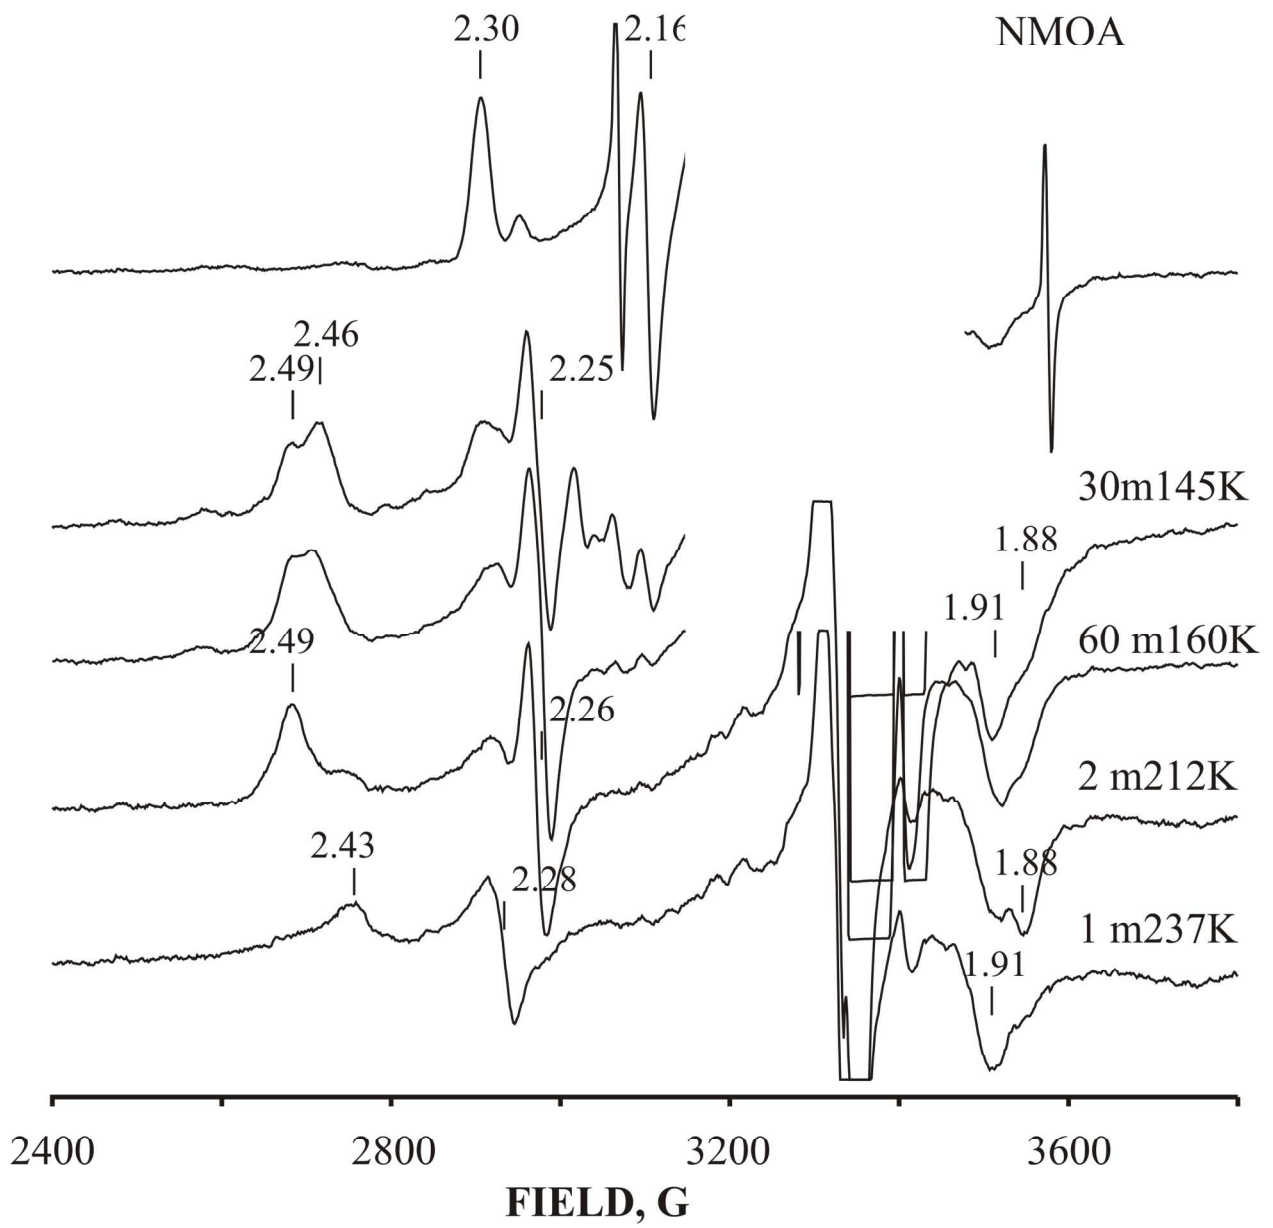

Figure S3.

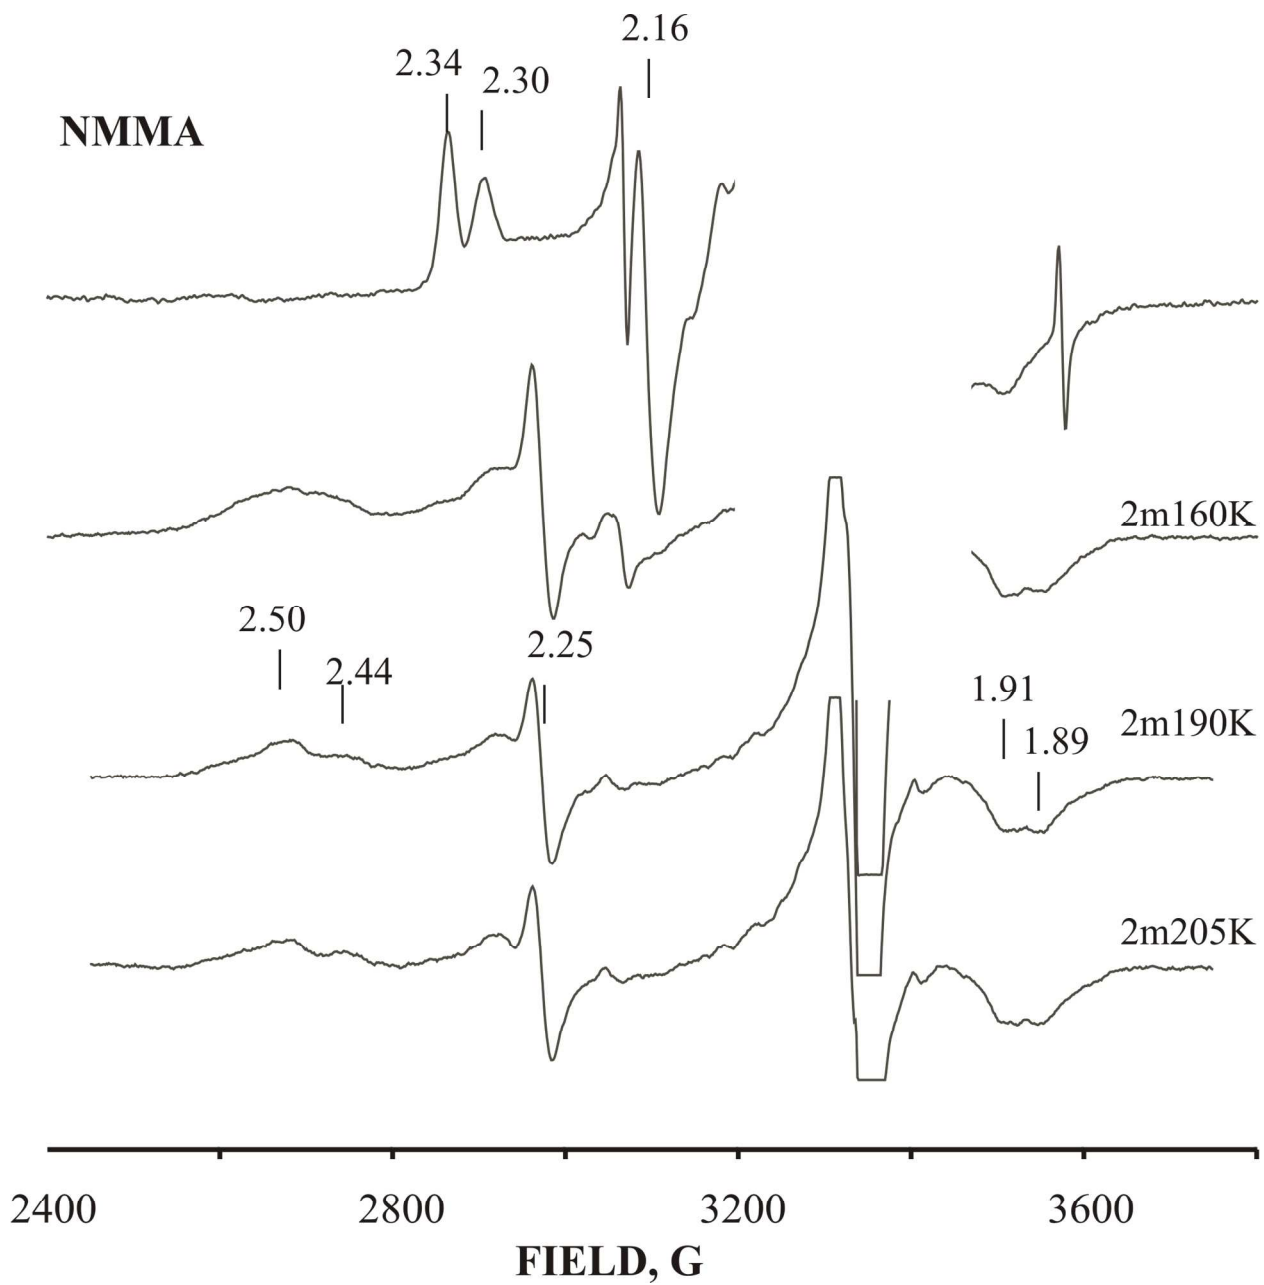

Supplement: Supplementary file 1 [file 3613761]
